# Supplementary material for: Unexpected vaginal bleeding and COVID-19 vaccination in nonmenstruating women
Source: PubMed Central journal article supplement — Sci Adv. 2023 Sep 22;9(38):eadg1391. doi: 10.1126/sciadv.adg1391 (PMC10516485; doi:10.1126/sciadv.adg1391), 2023-09-22
Supplement: sciadv.adg1391_sm.pdf [file sciadv.adg1391_sm.pdf]

Supplementary Materials for  
**Unexpected vaginal bleeding and COVID-19 vaccination in  
nonmenstruating women**

Kristine Blix *et al.*

Corresponding author: Kristine Blix, [kristine.blix@fhi.no](mailto:kristine.blix@fhi.no)

*Sci. Adv.* **9**, eadg1391 (2023)  
DOI: 10.1126/sciadv.adg1391

**This PDF file includes:**

Tables S1 to S3

**Table S1. Hormone/contraception use and gynecological conditions, by cohort and menopausal status**

|                                                     | Senior Cohort                    |                                  | MoBa Cohort                      |                                             |
|-----------------------------------------------------|----------------------------------|----------------------------------|----------------------------------|---------------------------------------------|
|                                                     | Postmenopausal Women<br>n = 2015 | Postmenopausal women<br>n = 5710 | Perimenopausal women<br>n = 7148 | Premenopausal, non-menstruating<br>n = 7052 |
| Age, mean (min, max)                                | 72.2 (66,81)                     | 54.6 (39,64)                     | 51.4 (35,63)                     | 46.1 (32,64)                                |
| <b>Hormone/contraception use (any), n (%)</b>       |                                  |                                  |                                  |                                             |
| Yes                                                 | 355 (17.6)                       | 1689 (29.6)                      | 4089 (57.2)                      | 6030 (85.5)                                 |
| No                                                  | 1660 (82.4)                      | 4021 (70.4)                      | 3059 (42.8)                      | 1022 (14.5)                                 |
| <b>Hormone/contraception use (specified), n (%)</b> |                                  |                                  |                                  |                                             |
| Combination pill                                    | N/A                              | 2 (<0.1)                         | 77 (1.1)                         | 187 (2.7)                                   |
| Progestin-only pill                                 | N/A                              | 8 (0.1)                          | 147 (2.1)                        | 330 (4.7)                                   |
| Hormonal IUD <sup>1</sup>                           | N/A                              | 692 (12.1) <sup>2</sup>          | 3274 (45.8) <sup>3</sup>         | 5199 (73.7)                                 |
| Copper IUD <sup>1</sup>                             | N/A                              | 38 (0.7)                         | 92 (1.3)                         | 80 (1.1)                                    |
| Contraceptive implant                               | N/A                              | 3 (<0.1)                         | 28 (0.4)                         | 79 (1.1)                                    |
| Other contraception                                 | N/A                              | 5 (0.1)                          | 28 (0.4)                         | 88 (1.2)                                    |
| Hormone replacement therapy (HRT)                   | 149 (7.4)                        | 785 (13.7)                       | 538 (7.5)                        | 56 (0.8)                                    |
| Other hormone treatment                             | 209 (10.4)                       | 422 (7.4)                        | 225 (3.1)                        | 74 (1.0)                                    |
| Missing specification                               | 2 (0.1)                          | 2 (<0.1)                         | 0 (0)                            | 2 (<0.1)                                    |
| <b>Gynecological condition (any), n (%)</b>         |                                  |                                  |                                  |                                             |
| Yes <sup>4</sup>                                    | 198 (9.8)                        | 1049 (18.4)                      | 1379 (19.3)                      | 1020 (14.5)                                 |
| No <sup>5</sup>                                     | 1772 (87.9)                      | 4421 (77.4)                      | 5441 (76.1)                      | 5843 (82.9)                                 |
| Don't know                                          | 45 (2.2)                         | 240 (4.2)                        | 328 (4.6)                        | 189 (2.7)                                   |
| <b>Gynecological condition (specified), n (%)</b>   |                                  |                                  |                                  |                                             |
| Myomas or adenomyosis                               | N/A                              | 420 (7.4)                        | 570 (8.0)                        | 300 (4.3)                                   |
| Endometriosis                                       | N/A                              | 236 (4.1)                        | 279 (3.9)                        | 216 (3.1)                                   |
| Polycystic ovarian syndrome                         | N/A                              | 94 (1.6)                         | 154 (2.2)                        | 196 (2.8)                                   |
| Cervical cancer                                     | 37 (1.8)                         | N/A                              | N/A                              | N/A                                         |
| Endometrial cancer                                  | 0                                | N/A                              | N/A                              | N/A                                         |
| Other condition in the cervix/uterus                | 162 (8.0)                        | 427 (7.5)                        | 531 (7.4)                        | 436 (6.2)                                   |

N/A, was not addressed in the questionnaire

<sup>1</sup>Intrauterine device

<sup>2</sup>178 report hormonal IUD in combination with HRT

<sup>3</sup>209 report hormonal IUD in combination with HRT

<sup>4</sup> Women who reported to have been diagnosed with myomas/adenomyosis, endometriosis, polycystic ovary syndrome, cervical cancer, endometrial cancer or "other gynecological condition"

<sup>5</sup> Women answered "No" to all abovementioned items

**Table S2. Incidence rates (IR) of unexpected vaginal bleeding per 100 person-years (PY) and hazard ratios (HR) with 95 % confidence intervals (CI) by vaccination status, in all, post-, peri- and premenopausal women (in sample without missing in any covariate)**

|                                                      | Events | PY   | IR per 100 PY<br>(95 % CI) | cHR <sup>1</sup> (95 %<br>CI) | aHR <sup>2</sup> (95 % CI) | aHR <sup>3</sup> (95 % CI) |
|------------------------------------------------------|--------|------|----------------------------|-------------------------------|----------------------------|----------------------------|
| <b>Postmenopausal<br/>(n=6132)</b>                   |        |      |                            |                               |                            |                            |
| Pre-vaccination                                      | 86     | 2173 | 4.0 (3.2-4.9)              | Ref                           | Ref                        | Ref                        |
| 1 <sup>st</sup> dose, ≤ 28 days                      | 53     | 461  | 11.5 (8.8 -15.0)           | 2.2 (1.4-3.4)                 | 2.9 (1.9-4.5)              | 2.7 (1.7-4.2)              |
| 1 <sup>st</sup> dose, > 28 days                      | 8      | 333  | 2.4 (1.2-4.8)              | 0.4 (0.2-0.9)                 | 0.5 (0.2-1.2)              | 0.5 (0.2-1.2)              |
| 2 <sup>nd</sup> dose, ≤ 28 days                      | 36     | 386  | 9.3 (6.7-12.9)             | 1.3 (0.8-2.2)                 | 2.2 (1.3-3.7)              | 2.0 (1.2-3.4)              |
| 2 <sup>nd</sup> dose, > 28 days +                    | 18     | 790  | 2.3 (1.4-3.6)              | 0.3 (0.2-0.6)                 | 0.8 (0.4-1.5)              | 0.7 (0.4-1.3)              |
| Total                                                | 201    | 4144 | 4.9 (4.2-5.6)              |                               |                            |                            |
| <b>Perimenopausal<br/>(n=5710)</b>                   |        |      |                            |                               |                            |                            |
| Pre-vaccination                                      | 298    | 2258 | 13.2 (11.8-14.8)           | Ref                           | Ref                        | Ref                        |
| 1 <sup>st</sup> dose, ≤ 28 days                      | 247    | 403  | 61.3 (54.1-69.4)           | 4.3 (3.4-5.4)                 | 4.3 (3.4-5.4)              | 4.3 (3.4-5.4)              |
| 1 <sup>st</sup> dose, > 28 days                      | 25     | 318  | 7.9 (5.3-11.6)             | 0.6 (0.4-1.0)                 | 0.6 (0.4-1.0)              | 0.6 (0.4-1.0)              |
| 2 <sup>nd</sup> dose, ≤ 28 days                      | 161    | 288  | 56.0 (48.0-65.3)           | 3.7 (2.9-4.9)                 | 3.7 (2.9-4.9)              | 3.7 (2.8-4.9)              |
| 2 <sup>nd</sup> dose, > 28 days                      | 58     | 339  | 17.1 (13.2-22.1)           | 1.2 (0.9-1.7)                 | 1.2 (0.9-1.7)              | 1.2 (0.9-1.7)              |
| Total                                                | 789    | 3606 | 21.8 (20.4-23.5)           |                               |                            |                            |
| <b>Premenopausal, non-<br/>menstruating (n=5633)</b> |        |      |                            |                               |                            |                            |
| Pre-vaccination                                      | 254    | 2245 | 11.3 (10.0-12.8)           | Ref                           | Ref                        | Ref                        |
| 1 <sup>st</sup> dose, ≤ 28 days                      | 243    | 398  | 61.1 (53.9-69.3)           | 4.6 (3.6-5.7)                 | 4.6 (3.7-5.7)              | 4.5 (3.6-5.6)              |
| 1 <sup>st</sup> dose, > 28 days                      | 20     | 285  | 7.0 (4.5-10.9)             | 0.6 (0.3-0.9)                 | 0.6 (0.4-1.0)              | 0.6 (0.3-0.9)              |
| 2 <sup>nd</sup> dose, ≤ 28 days                      | 160    | 270  | 59.4 (50.8-69.3)           | 4.2 (3.2-5.4)                 | 4.2 (3.2-5.5)              | 4.1 (3.1-5.3)              |
| 2 <sup>nd</sup> dose, > 28 days                      | 56     | 379  | 14.8 (11.4-19.2)           | 1.1 (0.8-1.5)                 | 1.1 (0.8-1.5)              | 1.0 (0.7-1.4)              |
| Total                                                | 733    | 3577 | 20.5 (19.1-22.0)           |                               |                            |                            |

<sup>1</sup> Crude HR

<sup>2</sup> HR adjusted for age

<sup>3</sup> HR adjusted for age, hormone use (any), body mass index, educational level and gynecological condition (any)

**Table S3. Incidence rates (IR) of unexpected vaginal bleeding and hazard ratios (HR) with 95 % confidence intervals (CI) by vaccination in post-, peri- and premenopausal women with and without gynecological conditions<sup>1</sup>**

|                                                     | Events | PY   | IR per 100 PY (95 % CI) | cHR <sup>3</sup> (95 % CI) | aHR <sup>4</sup> (95 % CI) |
|-----------------------------------------------------|--------|------|-------------------------|----------------------------|----------------------------|
| <b>Postmenopausal women</b>                         |        |      |                         |                            |                            |
| <b>Gynecological condition (any)<sup>2</sup></b>    |        |      |                         |                            |                            |
| No (n=6193)                                         |        |      |                         |                            |                            |
| Non/pre-vaccination                                 | 65     | 2164 | 3.0 (2.4-3.8)           | Ref                        | Ref                        |
| 1 <sup>st</sup> or 2 <sup>nd</sup> dose (≤ 28 days) | 71     | 861  | 8.2 (6.5-10.4)          | 1.7 (1.1-2.7)              | 2.8 (1.8-4.5)              |
| Yes (n=1247)                                        |        |      |                         |                            |                            |
| Non/pre-vaccination                                 | 38     | 452  | 8.4 (6.1-11.5)          | Ref                        | Ref                        |
| 1 <sup>st</sup> or 2 <sup>nd</sup> dose (≤ 28 days) | 36     | 166  | 21.7 (15.7-30.1)        | 2.0 (1.0-3.8)              | 2.3 (1.2-4.4)              |
| <b>Perimenopausal women</b>                         |        |      |                         |                            |                            |
| <b>Gynecological condition (any)<sup>2</sup></b>    |        |      |                         |                            |                            |
| No (n=5441)                                         |        |      |                         |                            |                            |
| Non/pre-vaccination                                 | 251    | 2160 | 11.6 (10.3-13.2)        | Ref                        | Ref                        |
| 1 <sup>st</sup> or 2 <sup>nd</sup> dose (≤ 28 days) | 375    | 663  | 56.6 (51.2-65.6)        | 4.6 (3.6-5.8)              | 4.6 (3.6-5.8)              |
| Yes (n=1379)                                        |        |      |                         |                            |                            |
| Non/pre-vaccination                                 | 106    | 536  | 19.8 (16.4-23.9)        | Ref                        | Ref                        |
| 1 <sup>st</sup> or 2 <sup>nd</sup> dose (≤ 28 days) | 117    | 160  | 73.1 (61.0-87.6)        | 3.5 (2.4-5.0)              | 3.5 (2.4-5.0)              |
| <b>Premenopausal women</b>                          |        |      |                         |                            |                            |
| <b>Gynecological condition (any)<sup>2</sup></b>    |        |      |                         |                            |                            |
| No (n=5843)                                         |        |      |                         |                            |                            |
| Non/pre-vaccination                                 | 238    | 2337 | 10.2 (9.0-11.6)         | Ref                        | Ref                        |
| 1 <sup>st</sup> or 2 <sup>nd</sup> dose (≤ 28 days) | 400    | 696  | 57.5 (52.1-63.4)        | 4.9 (3.9-6.0)              | 4.9 (3.9-6.1)              |
| Yes (n=1020)                                        |        |      |                         |                            |                            |
| Non/pre-vaccination                                 | 73     | 398  | 18.3 (14.6-23.0)        | Ref                        | Ref                        |
| 1 <sup>st</sup> or 2 <sup>nd</sup> dose (≤ 28 days) | 96     | 156  | 83.1 (68.0-101.5)       | 4.1 (2.7-6.3)              | 4.2 (2.7-6.4)              |

<sup>1</sup>A total of 802 women were excluded due to missing or unclear information on gynecological conditions (for instance if responding “don’t know” to one or several items)

<sup>2</sup> Myomas/adenomyosis, endometriosis, polycystic ovary syndrome, cervical cancer, endometrial cancer or “other gynecological condition”

<sup>3</sup> Crude HR

<sup>4</sup> Adjusted for age
